# Supplementary material for: Genomic epidemiology of global Klebsiella pneumoniae carbapenemase (KPC)-producing Escherichia coli
Source: PubMed Central journal article supplement (PMC5517641; doi:10.1038/s41598-017-06256-2), 2017-07-19
Supplement: 41598_2017_6256_MOESM1_ESM.pdf [file 41598_2017_6256_MOESM1_ESM.pdf]

## **SUPPLEMENTARY MATERIAL**

Manuscript title:

**Genomic epidemiology of global *Klebsiella pneumoniae* carbapenemase (KPC)-producing *Escherichia coli***

Author list:

Stoesser N, Sheppard AE, Peirano G, Anson LW, Pankhurst L, Sebra R, Phan HTT, Kasarskis A, Mathers AJ, Peto TEA, Bradford P, Motyl MR, Walker AS, Crook DW, Pitout JD

### **Supplementary methods**

#### **Illumina read processing**

##### **Stampy**

Run without Burrows-Wheeler Aligner premapping, using an expected substitution rate of 0.01

##### **cutadapt**

This was run specifying the adapter sequence using “-a CTGTCTCTTATACACATCT”

##### **mpileup flags**

- first run, with options “-E -M0 -Q25 -q30 -m2 -D -S” and otherwise default settings
- second run, with options “-B -M0 -Q0 -q0 -m2 -D -S” and otherwise default settings

## **Base call filtering**

Only those calls passing the following filters were retained:

- (i) the proportion of high-quality bases supporting the call was  $\geq 90\%$ , and  $\geq 5$  high-quality bases were required as a minimum, with at least one in the forward direction and at least one in the reverse direction
- (ii) the root of the mean square mapping quality of reads covering the site was  $\geq 30$
- (iii) the Phred scaled quality supporting the call was  $\geq 25$
- (iv) reads spanning the site were made up of  $\geq 35\%$  high-quality bases
- (v) the site was not called as heterozygous

**Comparisons of A5-MiSeq and SPAdes assemblies for isolates sequenced by both PacBio and Illumina in this dataset (n=18).**

The closed PacBio assembly for each isolate was used as the respective reference for comparisons.

**1. Total number of contigs**

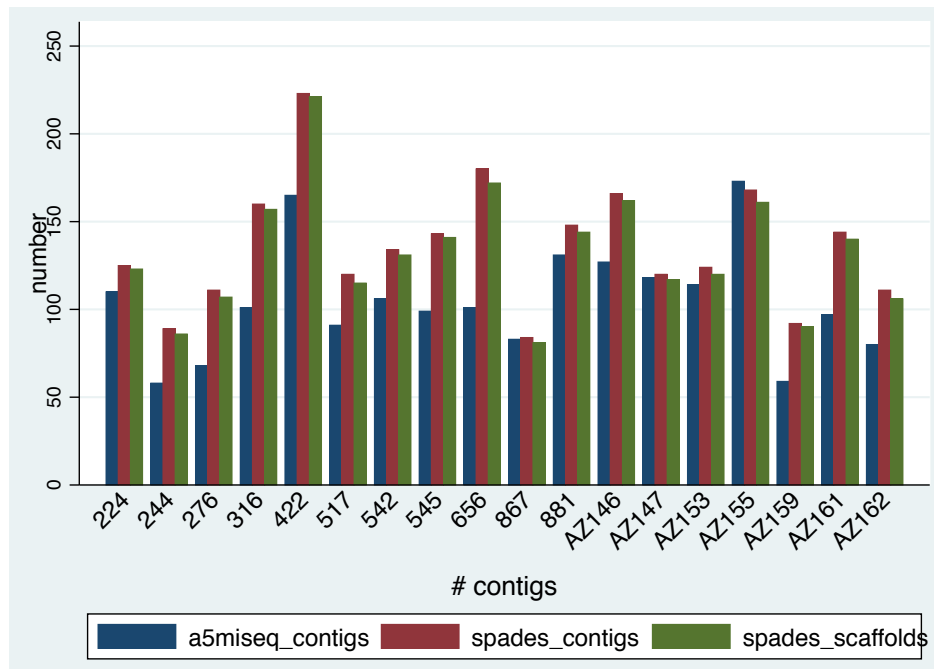

**2. N50**

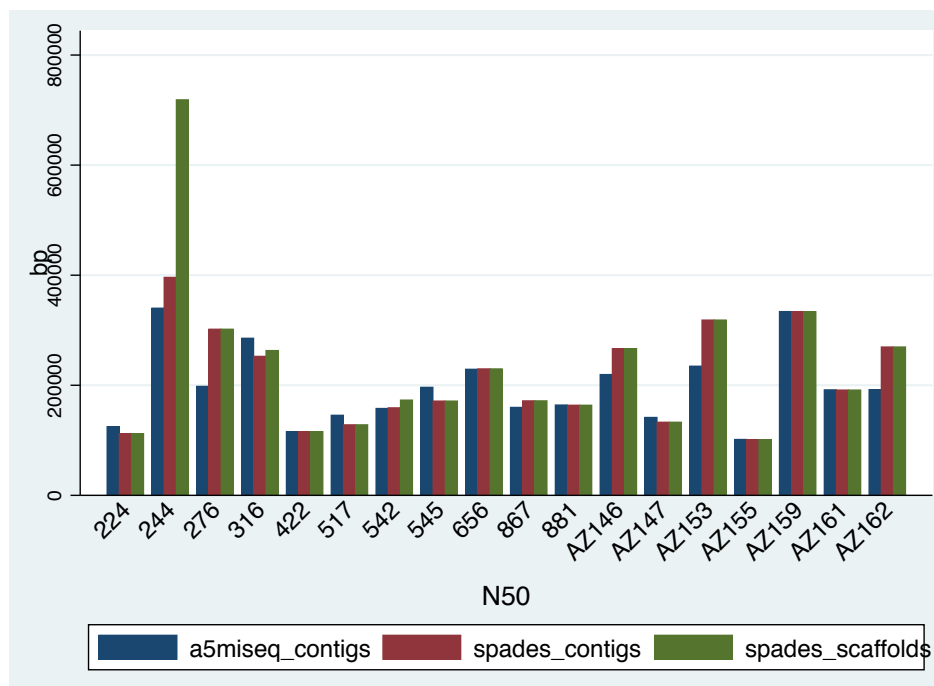

### 3. Percentage of reference captured following alignment of contigs to reference

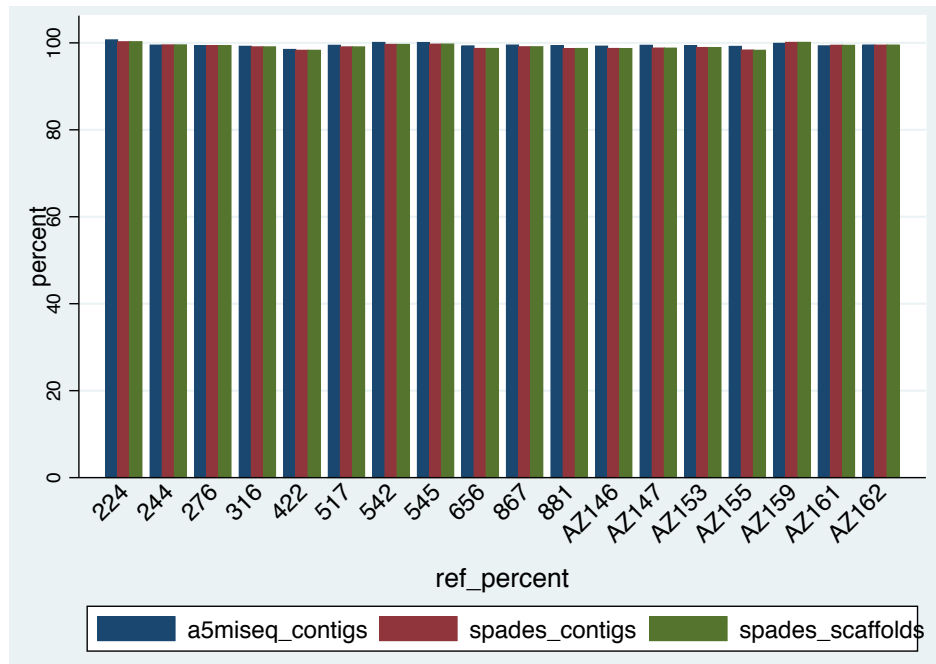

**4. Comparisons of *de novo* assembled KPC *E. coli* isolates using unscaffolded A5-MiSeq (top) and SPAdes contigs (bottom), versus the PacBio assembly for each respective isolate (chromosome plus plasmids). Each assembled contig is represented by a coloured block, staggered to represent contig boundaries. Contigs are coloured (i) green if they are consistent with the reference and (ii) red if they contain misassemblies.**

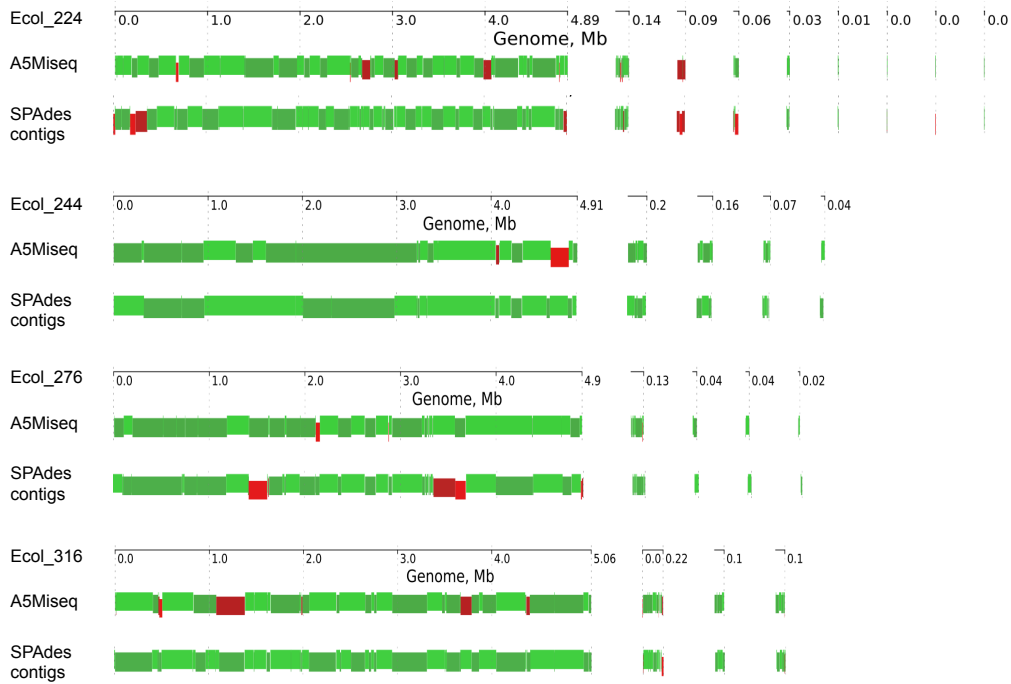

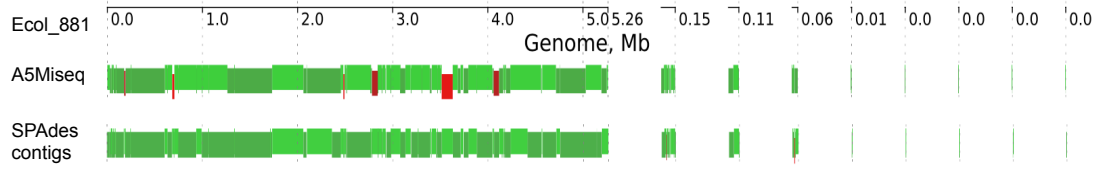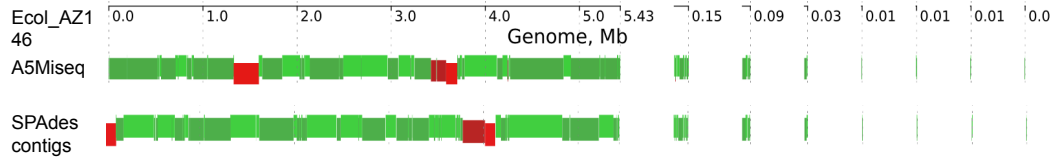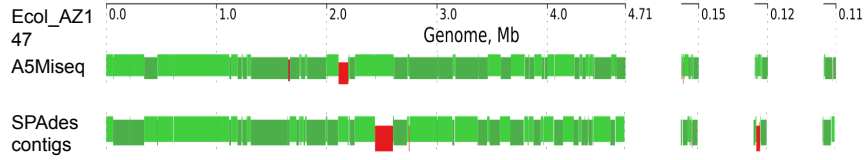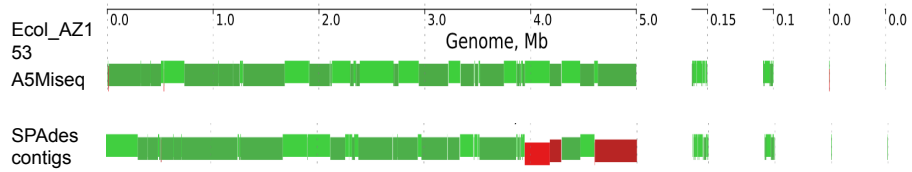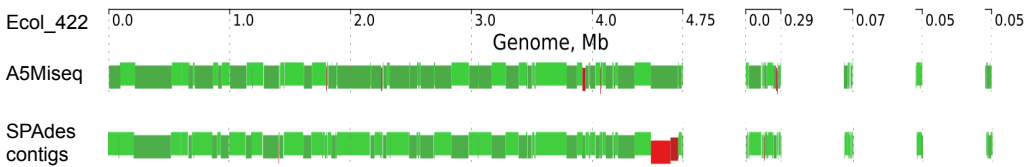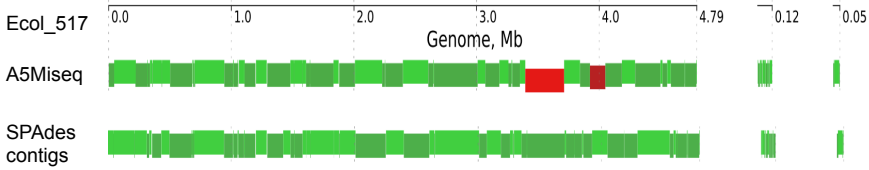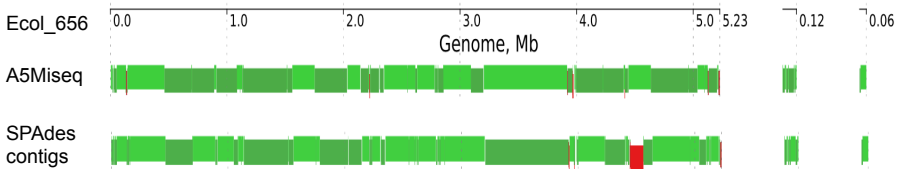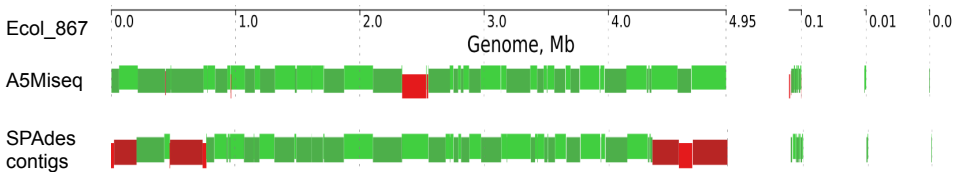

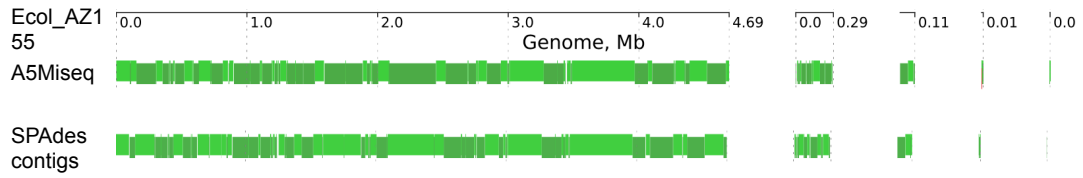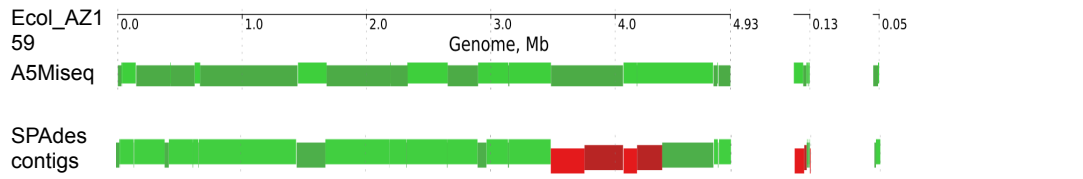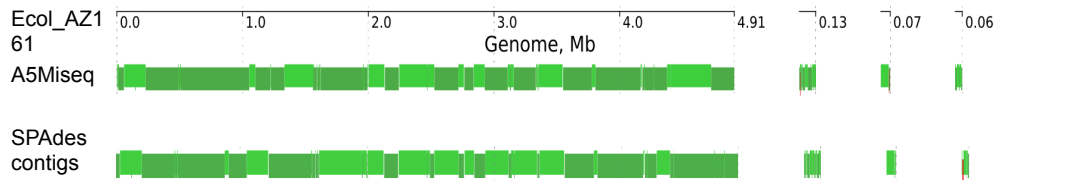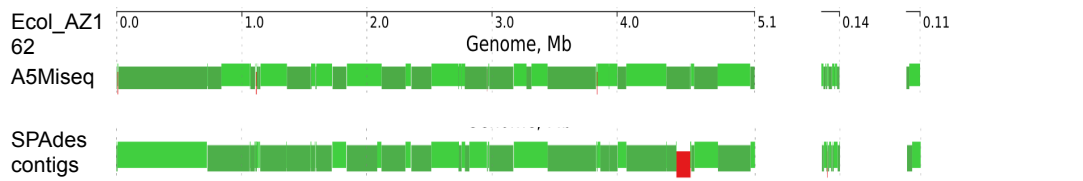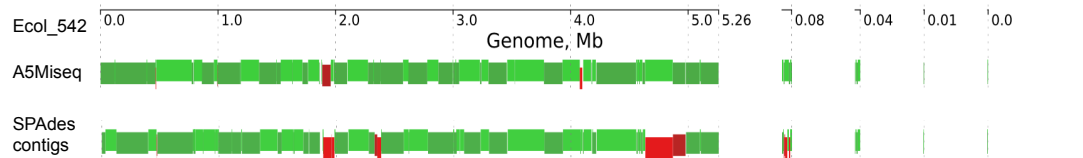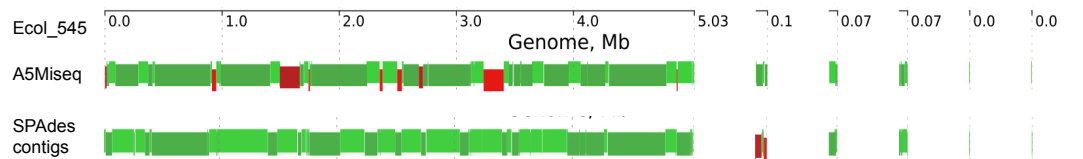

**5A. Assessment of KPC-harboring contigs for each assembler - size and dotplot  
(sequence alignment characteristics)**

| <b>Isolate</b> | <b>A5-Miseq kpc contig size (bp)</b> | <b>SPAdes kpc contig size (bp)</b> | <b>Size difference<br/>(positive value indicates A5-Miseq contig is bigger, negative value indicates SPAdes contig is bigger)</b> |
|----------------|--------------------------------------|------------------------------------|-----------------------------------------------------------------------------------------------------------------------------------|
| ecol_224       | 38355                                | 49718                              | -11363                                                                                                                            |
| ecol_244       | 24191                                | 23851                              | 340                                                                                                                               |
| ecol_276       | 16858                                | 16686                              | 172                                                                                                                               |
| ecol_316       | 6066                                 | 5722                               | 344                                                                                                                               |
| ecol_422       | 19735                                | 19391                              | 344                                                                                                                               |
| ecol_517       | 39072                                | 35306                              | 3766                                                                                                                              |
| ecol_542       | 43620                                | 25825                              | 17795                                                                                                                             |
| ecol_545       | 7032                                 | 3045                               | 3987                                                                                                                              |
| ecol_656       | 47373                                | 56497                              | -9124                                                                                                                             |
| ecol_867       | 14328                                | 14052                              | 276                                                                                                                               |
| ecol_881       | 33687                                | 32099                              | 1588                                                                                                                              |
| ecol_AZ146     | 42505                                | 45138                              | -2633                                                                                                                             |
| ecol_AZ147     | 63239                                | 62896                              | 343                                                                                                                               |
| ecol_AZ153     | 7483                                 | 7142                               | 341                                                                                                                               |
| ecol_AZ155     | 7485                                 | 7142                               | 341                                                                                                                               |
| ecol_AZ159     | 47531                                | 47658                              | -127                                                                                                                              |
| ecol_AZ161     | 11170                                | 10259                              | 911                                                                                                                               |
| ecol_AZ162     | 12197                                | 11900                              | 297                                                                                                                               |

**5B. Dotplot comparisons of KPC-harboring contigs by A5-Miseq and SPAdes assemblers can be accessed in the zipped datasets included as part of the online supplement.**



## SUPPLEMENTARY FIGURE

### Supplementary Figure S1. Phylogeny for the ST131 KPC-*Escherichia coli* strains

identified in this study (n=16), and heatmap representing associated core and accessory components.

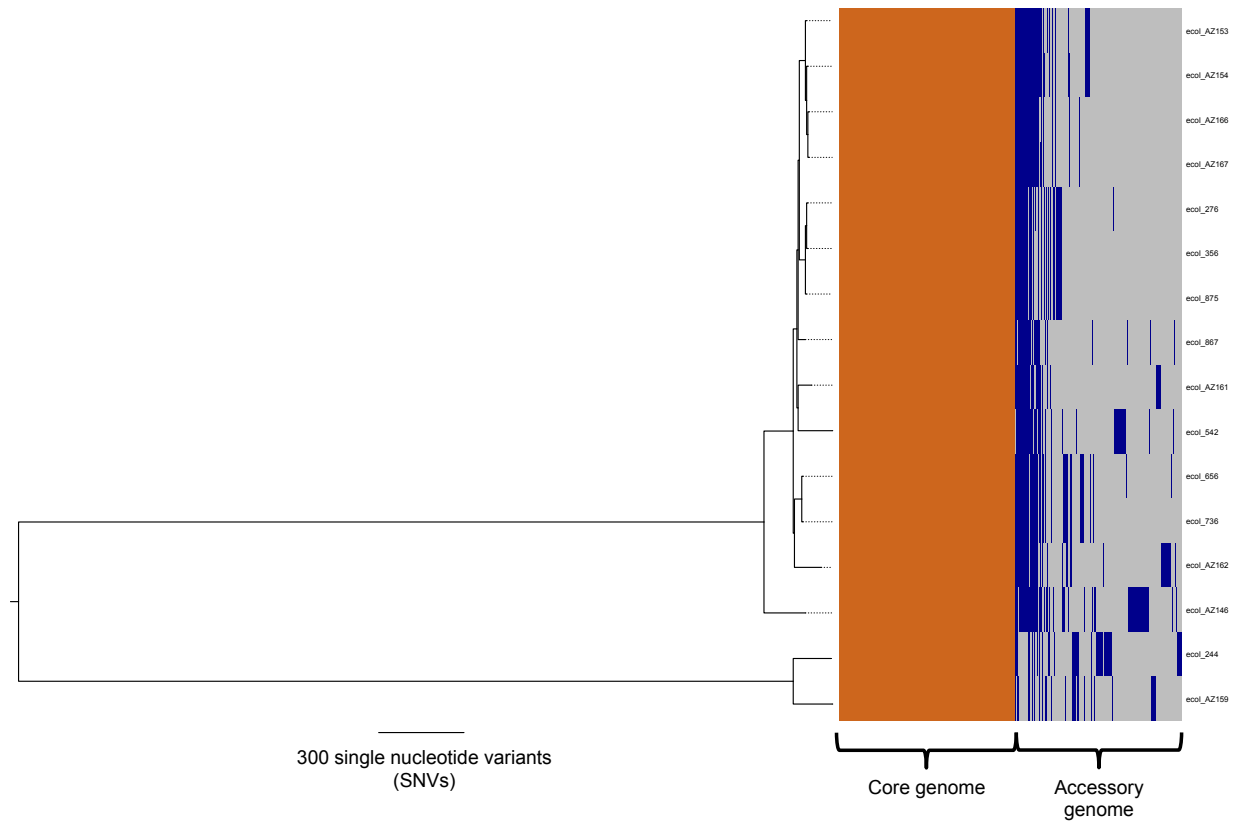

## **SUPPLEMENTARY TABLES (included as separate files)**

**Supplementary Table 1.** Original laboratory-based typing results for study strains, sequencing methods used to generate whole genome sequencing (WGS) data for the study, WGS quality metrics, and WGS-based typing results.

**Supplementary Table 2.** Information on the presence, copy number and nucleotide/amino acid level variation of resistance genes identified from the WGS data using the ResistType tool. Also includes typing results for the sequenced DH10B *Escherichia coli* control, and for the ecol\_252 isolate which was excluded from subsequent analyses as *bla*<sub>KPC</sub> was not present in the sequenced extract.

**Supplementary Table 3.** Details of top blast matches of each of the fully resolved plasmid sequences identified in this study.

**Supplementary Table 4.** Publicly available IncN *bla*<sub>KPC</sub> plasmid sequences used for comparisons.

**Supplementary Table 5.** Publicly available plasmid sequences used for comparisons.
